# Supplementary material
Source: ML conference proceedings conference paper supplement (https://proceedings.neurips.cc/paper_files/paper/2022/hash/4d4a3b6a34332d80349137bcc98164a5-Abstract.html)
Supplement: Supplementary file 1 [file 4d4a3b6a34332d80349137bcc98164a5-Supplemental-Conference.zip]

Archive with 45 entries (39 files):
- Supplementary Materials/
- Supplementary Materials/KDGA_Appendix.pdf
- Supplementary Materials/Source Code/
- Supplementary Materials/Source Code/README.md
- Supplementary Materials/Source Code/data/
- Supplementary Materials/Source Code/data/graphs/
- Supplementary Materials/Source Code/data/graphs/chameleon_adj.pkl
- Supplementary Materials/Source Code/data/graphs/chameleon_features.pkl
- Supplementary Materials/Source Code/data/graphs/chameleon_labels.pkl
- Supplementary Materials/Source Code/data/graphs/chameleon_tvt_nids.pkl
- Supplementary Materials/Source Code/data/graphs/citeseer_adj.pkl
- Supplementary Materials/Source Code/data/graphs/citeseer_features.pkl
- Supplementary Materials/Source Code/data/graphs/citeseer_labels.pkl
- Supplementary Materials/Source Code/data/graphs/citeseer_tvt_nids.pkl
- Supplementary Materials/Source Code/data/graphs/cora_adj.pkl
- Supplementary Materials/Source Code/data/graphs/cora_features.pkl
- Supplementary Materials/Source Code/data/graphs/cora_labels.pkl
- Supplementary Materials/Source Code/data/graphs/cora_tvt_nids.pkl
- Supplementary Materials/Source Code/data/graphs/cornell_adj.pkl
- Supplementary Materials/Source Code/data/graphs/cornell_features.pkl
- Supplementary Materials/Source Code/data/graphs/cornell_labels.pkl
- Supplementary Materials/Source Code/data/graphs/cornell_tvt_nids.pkl
- Supplementary Materials/Source Code/data/graphs/film_adj.pkl
- Supplementary Materials/Source Code/data/graphs/film_features.pkl
- Supplementary Materials/Source Code/data/graphs/film_labels.pkl
- Supplementary Materials/Source Code/data/graphs/film_tvt_nids.pkl
- Supplementary Materials/Source Code/data/graphs/squirrel_adj.pkl
- Supplementary Materials/Source Code/data/graphs/squirrel_features.pkl
- Supplementary Materials/Source Code/data/graphs/squirrel_labels.pkl
- Supplementary Materials/Source Code/data/graphs/squirrel_tvt_nids.pkl
- Supplementary Materials/Source Code/data/graphs/texas_adj.pkl
- Supplementary Materials/Source Code/data/graphs/texas_features.pkl
- Supplementary Materials/Source Code/data/graphs/texas_labels.pkl
- Supplementary Materials/Source Code/data/graphs/texas_tvt_nids.pkl
- Supplementary Materials/Source Code/data/graphs/wisconsin_adj.pkl
- Supplementary Materials/Source Code/data/graphs/wisconsin_features.pkl
- Supplementary Materials/Source Code/data/graphs/wisconsin_labels.pkl
- Supplementary Materials/Source Code/data/graphs/wisconsin_tvt_nids.pkl
- Supplementary Materials/Source Code/param/
- Supplementary Materials/Source Code/param/best_parameters.json
- Supplementary Materials/Source Code/src/
- Supplementary Materials/Source Code/src/dataset.py
- Supplementary Materials/Source Code/src/main.py
- Supplementary Materials/Source Code/src/model.py
- Supplementary Materials/Source Code/src/utils.py
