# Supplementary material
Source: ML conference proceedings conference paper supplement (https://proceedings.neurips.cc/paper_files/paper/2022/hash/4d4a3b6a34332d80349137bcc98164a5-Abstract.html)
Supplement: Supplementary file 1 [file 4d4a3b6a34332d80349137bcc98164a5-Supplemental-Conference.zip › Supplementary Materials/Source Code/param/best_parameters.json]

{
    "cora": {
        "0": {
            "dataset": "cora",
            "hid_dim": 256,
            "dropout": 0.6,
            "alpha": 0.3,
            "temp_ga": 1.0,
            "temp_kd": 1.0,
            "ratio_ga": 0.1,
            "ratio_kd": 20,
            "lr": 0.01,
            "weight_decay": 0.0005,
            "ga_epochs": 200,
            "nc_epochs": 50,
            "n_epochs": 500,
            "seed": 2022,
            "save_mode": 1,
            "loss_mode": 0,
            "data_mode": 0
        }
    },
    "citeseer": {
        "0": {
            "dataset": "citeseer",
            "hid_dim": 256,
            "dropout": 0.6,
            "alpha": 0.5,
            "temp_ga": 1.0,
            "temp_kd": 1.0,
            "ratio_ga": 1.0,
            "ratio_kd": 5.0,
            "lr": 0.01,
            "weight_decay": 0.0005,
            "ga_epochs": 300,
            "nc_epochs": 300,
            "n_epochs": 500,
            "seed": 2022,
            "save_mode": 1,
            "loss_mode": 0,
            "data_mode": 1
        }
    },
    "cornell": {
        "0": {
            "dataset": "cornell",
            "hid_dim": 128,
            "dropout": 0.5,
            "alpha": 1.0,
            "temp_ga": 1.0,
            "temp_kd": 1.3,
            "ratio_ga": 0.1,
            "ratio_kd": 1.0,
            "lr": 5e-3,
            "weight_decay": 0.0005,
            "ga_epochs": 300,
            "nc_epochs": 200,
            "n_epochs": 500,
            "seed": 2022,
            "save_mode": 1,
            "loss_mode": 0,
            "data_mode": 2
        }
    },
    "texas": {
        "0": {
            "dataset": "texas",
            "hid_dim": 128,
            "dropout": 0.5,
            "alpha": 1.0,
            "temp_ga": 1.0,
            "temp_kd": 1.2,
            "ratio_ga": 0.5,
            "ratio_kd": 1.0,
            "lr": 1e-3,
            "weight_decay": 0.0005,
            "ga_epochs": 200,
            "nc_epochs": 50,
            "n_epochs": 500,
            "seed": 2022,
            "save_mode": 1,
            "loss_mode": 0,
            "data_mode": 3
        }
    },
    "wisconsin": {
        "0": {
            "dataset": "wisconsin",
            "hid_dim": 64,
            "dropout": 0.7,
            "alpha": 1.0,
            "temp_ga": 1.0,
            "temp_kd": 1.1,
            "ratio_ga": 1.0,
            "ratio_kd": 0.5,
            "lr": 1e-3,
            "weight_decay": 1e-3,
            "ga_epochs": 200,
            "nc_epochs": 50,
            "n_epochs": 500,
            "seed": 2022,
            "save_mode": 1,
            "loss_mode": 0,
            "data_mode": 4
        }
    },
    "film": {
        "0": {
            "dataset": "film",
            "hid_dim": 128,
            "dropout": 0.6,
            "alpha": 0.3,
            "temp_ga": 1.0,
            "temp_kd": 1.4,
            "ratio_ga": 0.5,
            "ratio_kd": 0.1,
            "lr": 5e-3,
            "weight_decay": 0.0005,
            "ga_epochs": 200,
            "nc_epochs": 50,
            "n_epochs": 500,
            "seed": 2022,
            "save_mode": 1,
            "loss_mode": 0,
            "data_mode": 5
        }
    },
    "squirrel": {
        "0": {
            "dataset": "squirrel",
            "hid_dim": 256,
            "dropout": 0.5,
            "alpha": 0.3,
            "temp_ga": 1.0,
            "temp_kd": 1.0,
            "ratio_ga": 0.1,
            "ratio_kd": 1.0,
            "lr": 5e-3,
            "weight_decay": 0.0005,
            "ga_epochs": 300,
            "nc_epochs": 200,
            "n_epochs": 500,
            "seed": 2022,
            "save_mode": 1,
            "loss_mode": 0,
            "data_mode": 6
        }
    },
    "chameleon": {
        "0": {
            "dataset": "chameleon",
            "hid_dim": 256,
            "dropout": 0.5,
            "alpha": 0.3,
            "temp_ga": 1.0,
            "temp_kd": 1.1,
            "ratio_ga": 1.0,
            "ratio_kd": 1.0,
            "lr": 0.01,
            "weight_decay": 0.0005,
            "ga_epochs": 50,
            "nc_epochs": 200,
            "n_epochs": 500,
            "seed": 2022,
            "save_mode": 1,
            "loss_mode": 0,
            "data_mode": 7
        }
    }
}
