# Supplementary material
Source: ML conference proceedings conference paper supplement (https://proceedings.neurips.cc/paper_files/paper/2022/hash/4d4a3b6a34332d80349137bcc98164a5-Abstract.html)
Supplement: Supplementary file 1 [file 4d4a3b6a34332d80349137bcc98164a5-Supplemental-Conference.zip › Supplementary Materials/Source Code/src/utils.py]

import torch
import numpy as np


def evaluation(logits, labels):
    preds = torch.argmax(logits, dim=1)
    correct = torch.sum(preds == labels)
    accuracy = correct.item() / len(labels)

    return accuracy

def SetSeed(seed):
    np.random.seed(seed)
    torch.manual_seed(seed)
    torch.cuda.manual_seed(seed)
